# Supplementary material for: Single-cell transcriptomic analysis of the tumor ecosystem of adenoid cystic carcinoma
Source: PubMed Central journal article supplement (PMC9714264; doi:10.3389/fonc.2022.1063477), 2022-11-17
Supplement: DataSheet_1.pdf [file DataSheet_1.pdf]

## Single-cell transcriptomic analysis of the tumor ecosystem of adenoid cystic carcinoma

*Quanquan Lin<sup>1,4,†</sup>, Zhanjie Fang<sup>2,3†</sup>, Jinlong Sun<sup>4,†</sup>, Fei Chen<sup>1,†</sup>, Yipeng Ren<sup>1</sup>, Zhenhong Fu<sup>1</sup>, Sefei Yang<sup>1</sup>, Lin Feng<sup>1</sup>, Feng Wang<sup>4</sup>, Zhigang Song<sup>1</sup>, Wei Chen<sup>1</sup>, Wenjun Yu<sup>1</sup>, Chen Wang<sup>2,3</sup>, Yixin Shi<sup>2,3</sup>, Yue Liang<sup>2,3</sup>, Haizhong Zhang<sup>1</sup>, Hongzhu Qu<sup>2,3\*</sup>, Xiangdong Fang<sup>2,3,\*</sup>, Qing Xi<sup>1\*</sup>*

<sup>1</sup> Department of Stomatology, First Medical Center of PLA General Hospital, Beijing 100853, China.

<sup>2</sup> CAS Key Laboratory of Genome Sciences and Information, Beijing Key Laboratory of Genome and Precision Medicine Technologies, Beijing Institute of Genomics, Chinese Academy of Sciences/China National Center for Bioinformation, Beijing, China

<sup>3</sup> University of Chinese Academy of Sciences, Beijing, China

<sup>4</sup> Department of Stomatology, Sixth Medical Center of PLA General Hospital, Beijing 100048, China.

† These authors contributed equally to this study.

\* Corresponding authors:

Prof. Hongzhu Qu, E-mail: [quhongzhu@big.ac.cn](mailto:quhongzhu@big.ac.cn)

Prof. Xiangdong Fang, E-mail: [fangxd@big.ac.cn](mailto:fangxd@big.ac.cn)

Prof. Qing Xi, E-mail: [xiqing301@163.com](mailto:xiqing301@163.com)

**Supplementary files**

A

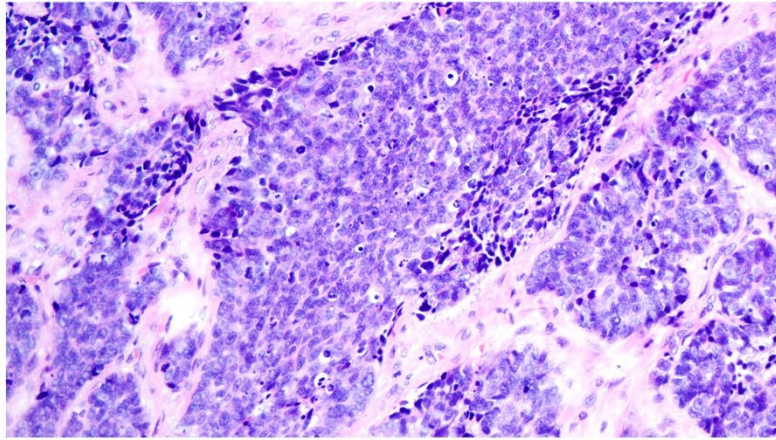

B

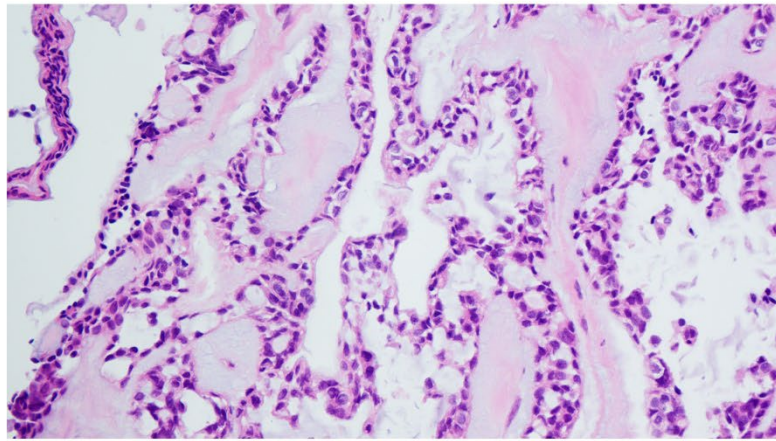

C

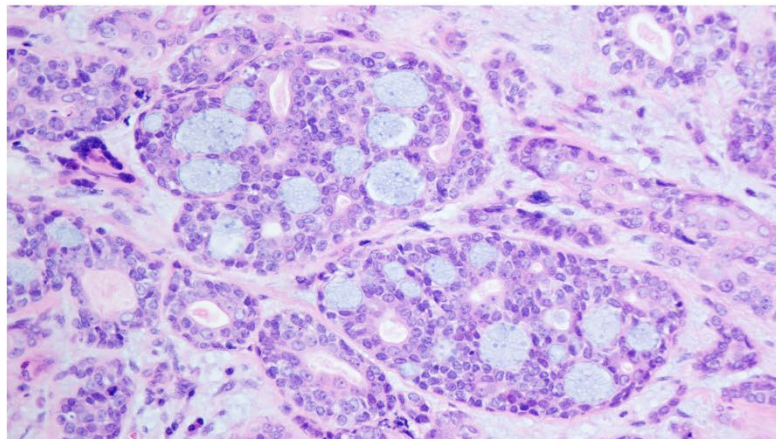

**Figure S1. Staining pathologic sections of the tumor tissues of three patients were observed under a 400X microscope. (A) patient 0222 (B) patient 0329 (C) patient 7420**

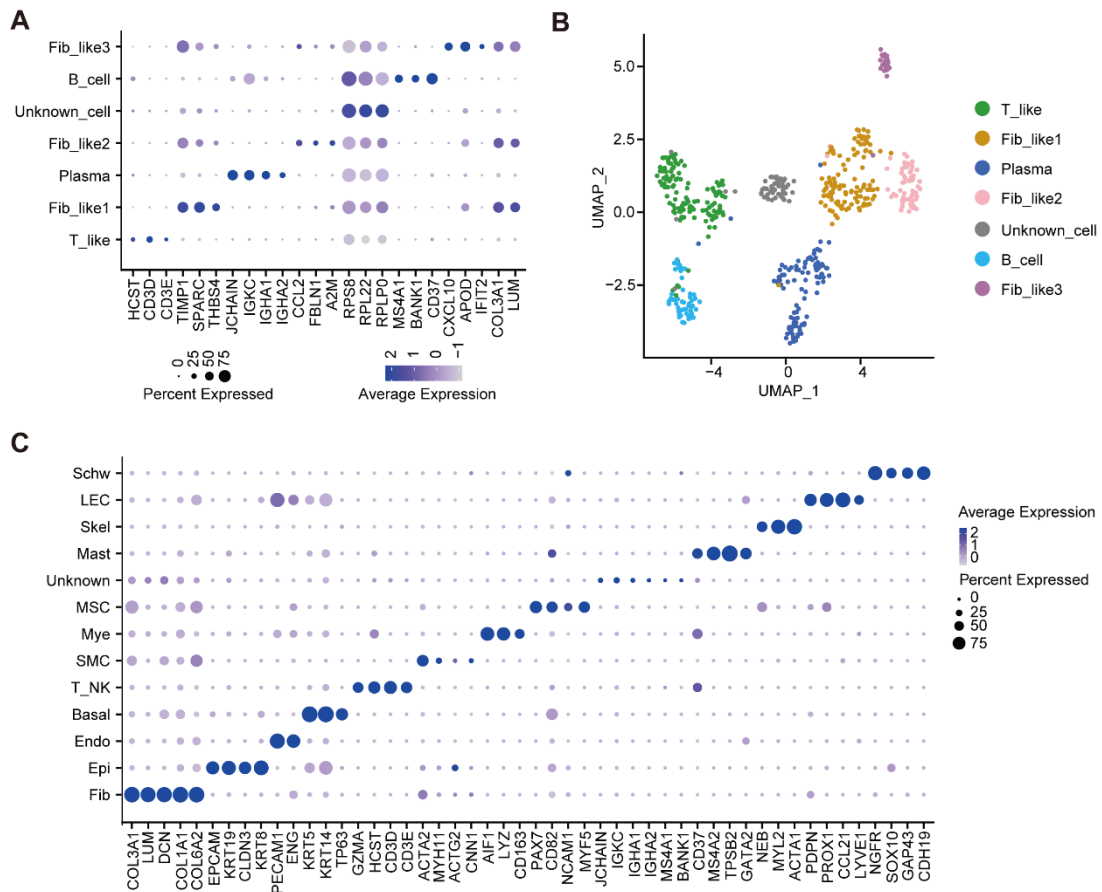

**Figure S2. Relative expression of marker genes of different cell clusters.** (A) Dot plot showing the relative expression of marker genes for various subtypes of undefined cell cluster. (B) UMAP plot shows seven cell populations reaggreated from “Unknown” cluster. (C) Dot plot showing the relative expression of marker genes for each main cell type.



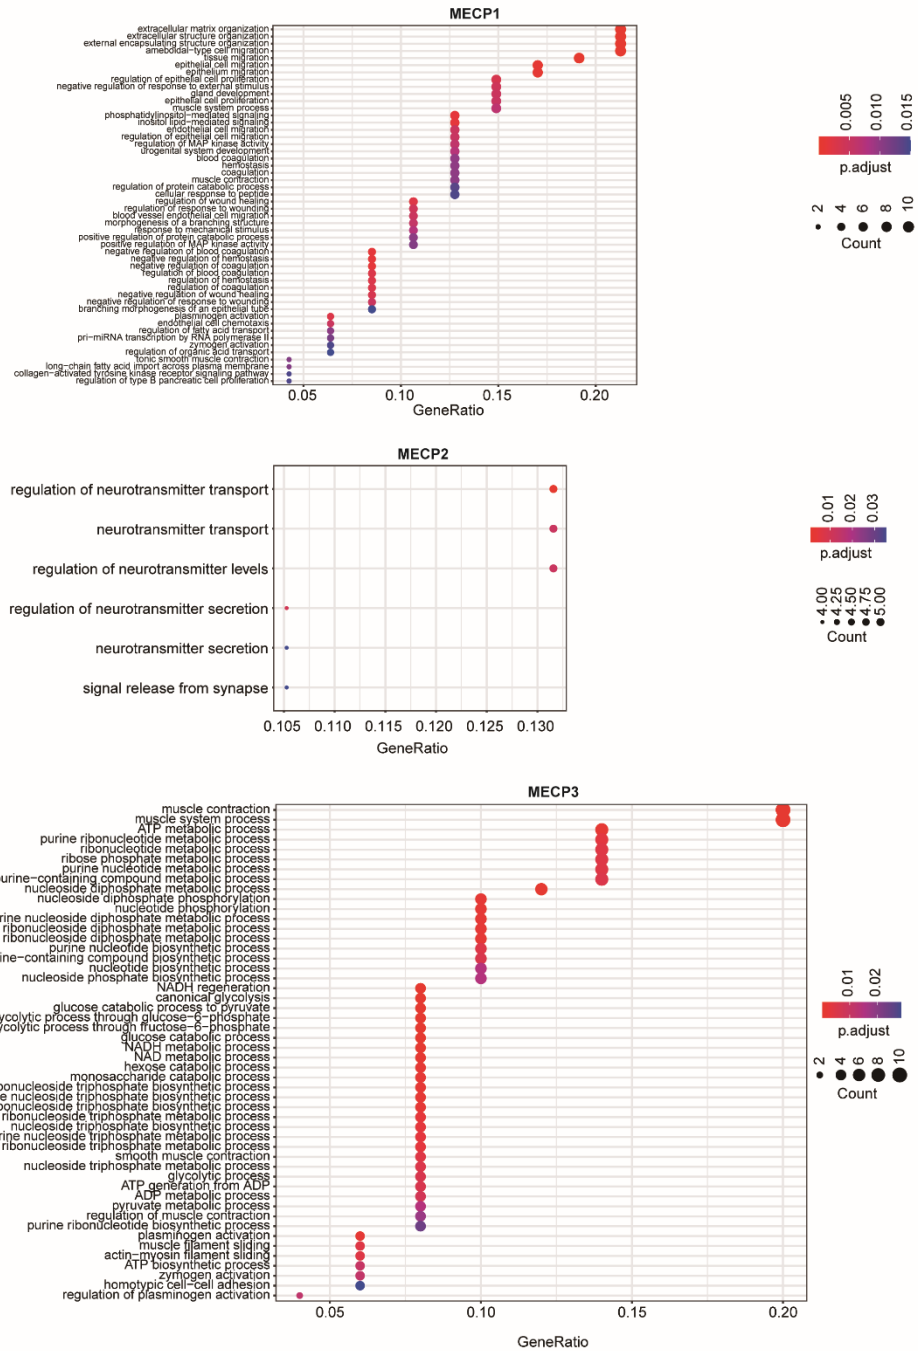

**Figure S4. Dot plot showing the results of GO enrichment analysis for core gene sets of major expression programs in myoepithelial-like cells.**

**A**

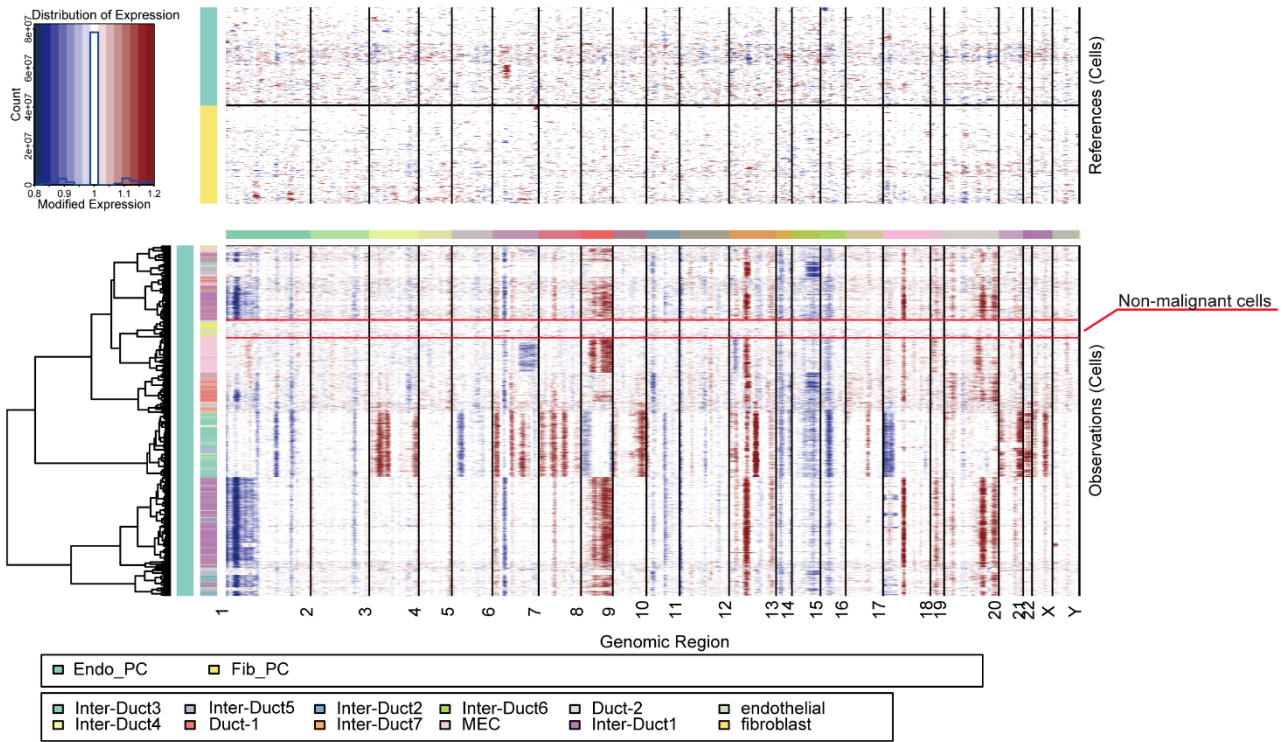

**B**

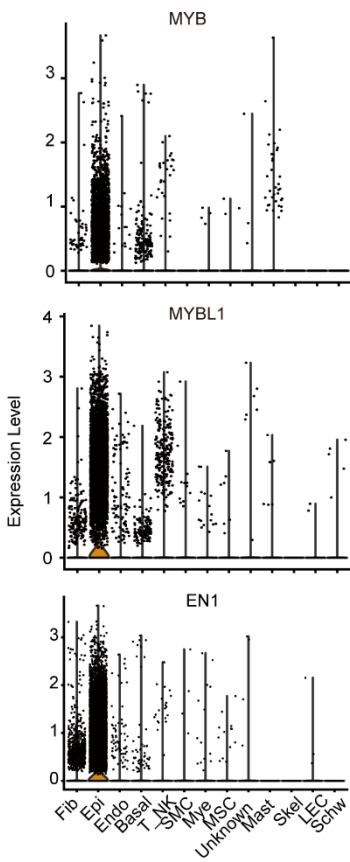

**C**

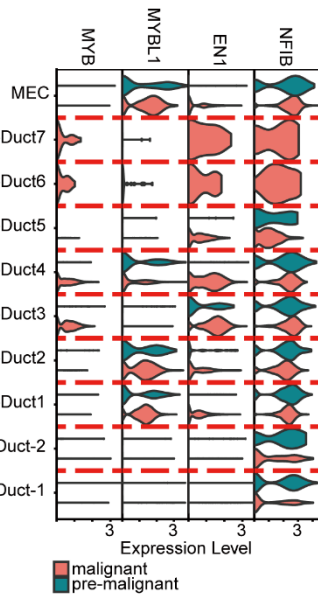

**D**

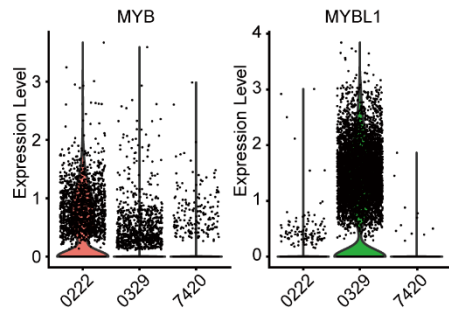

**E**

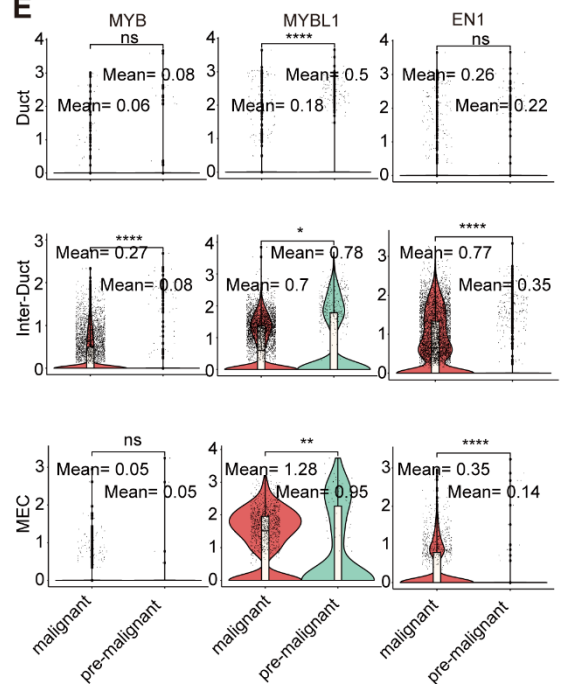

**F**

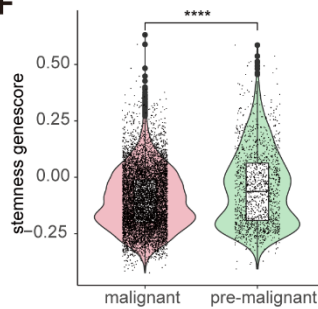

**Figure S5. Identification of malignant epithelial cells.**

(A) Inferred large-scale chromosomal copy number alterations were used to discern malignant cells. Nonmalignant cells were identified and labeled on the right side of the figure. (B) Violin plots showing the expression of MYB (upper), MYBL1 (middle), and EN1 (lower) in different cell types. (C) Violin plot showing the expression of MYB/MYBL1/EN1/NFIB in different epithelial cell subtypes. Malignant states are distinguished by different colors. (D) Violin plot showing the expression of MYB/MYBL1 in epithelial cells from different patients. (E) Stemness geneset scores were calculated for “malignant” and “pre-malignant” groups. All p-values were calculated by two-tailed *t* test. \*\*\*\*  $p \leq 0.0001$ . (F) Violin plot showing the expression of MYB/MYBL1/EN1 in three main epithelial cell subtypes between “malignant” and “pre-malignant” groups. All p-values were calculated using two-tailed *t* test. ns,  $p > 0.05$ , \*  $p \leq 0.05$ , \*\*  $p \leq 0.01$ , and \*\*\*\*  $p \leq 0.0001$

**Supplementary Table 1. Quality control information of each sample.**

| Patient ID | Sample Source  | Estimated Number of Cells | Median Genes per Cell | Sequencing Saturation (%) | Number of cells after QC |
|------------|----------------|---------------------------|-----------------------|---------------------------|--------------------------|
| 0222       | Para-carcinoma | 9,962                     | 3022                  | 42.3%                     | 8454                     |
| 0222       | Carcinoma      | 6,958                     | 3,334                 | 56.2%                     | 6306                     |
| 0329       | para-carcinoma | 8,277                     | 2,780                 | 64.3%                     | 7512                     |
| 0329       | Carcinoma      | 6,633                     | 2,674                 | 51.8%                     | 5205                     |
| 7420       | para-carcinoma | 10,012                    | 1,509                 | 72.9%                     | 8227                     |
| 7420       | Carcinoma      | 8,106                     | 1,718                 | 65.2%                     | 7010                     |



**Supplementary Table 2. Detailed clinical information of each patient.**

| Sample | Age | Sex    | Foci                 | Pathology       |
|--------|-----|--------|----------------------|-----------------|
| 0222   | 65  | Male   | Right buccal mucosal | Solid type      |
| 0329   | 51  | Female | Left mouth floor     | Cribriform type |
| 7420   | 55  | Female | Left tongue          | Cribriform type |

**Supplementary Table 3. Dominant genes in each expression program of three main epithelial subtypes.**

| <b>Duct</b> |            |            |
|-------------|------------|------------|
| <b>P1</b>   | <b>P2</b>  | <b>P3</b>  |
| SMARCD3     | MUL1       | PTGFR      |
| BX322562.1  | CHD1L      | ADM        |
| PRAME       | ZC3H11A    | LMO3       |
| SHLD1       | CSTA       | JAZF1      |
| SUPT7L      | ADAMTS2    | ARHGAP31   |
| PWWP2B      | BBS9       | USP45      |
| HIGD1B      | AL158206.1 | DCLRE1C    |
| MUC16       | AC132192.2 | ZC3H10     |
| IL1R2       | LINC02762  | PHETA1     |
| ASH1L.AS1   | SLC37A4    | AK5        |
| AC099332.1  | JHY        | DENND4B    |
| MIR3142HG   | GPR180     | DNM3OS     |
| TRAM2.AS1   | DMXL2      | COLGALT2   |
| AC025031.4  | CYGB       | DUSP19     |
| CPB2.AS1    | LYL1       | EPHA3      |
| C17orf67    | TRIB3      | SLC49A3    |
| SSTR2       | AL034417.3 | ENPEP      |
| KRTDAP      | GJA4       | HAND2.AS1  |
| EML2        | CSF1       | KCNK17     |
| GSPT2       | NFASC      | FAM135A    |
| ATAD3C      | AC092164.1 | LINC00997  |
| LINC01137   | HAAO       | ADAM22     |
| LURAP1      | TNS1       | GPC2       |
| WDR63       | GHRLOS     | ASTN2      |
| ASTN1       | SLC6A1     | PNPLA7     |
| GOLT1A      | AC092903.2 | FAM180B    |
| LYPLAL1.DT  | CTBP1.DT   | SLC16A7    |
| LINC01703   | ADAMTS3    | ZC2HC1C    |
| PLGLB2      | ABCG2      | SETD1A     |
| GCC2.AS1    | CDH6       | AC092140.2 |
| RGPD8       | NRG2       | BORCS6     |
| AC006460.2  | ME1        | CDK5R1     |
| MAATS1      | RPS6KA2    | PIEZO2     |
| CAMK2N2     | PDE1C      | PCSK4      |
| AC072022.2  | SRRM3      | EVI5L      |
| LINC00989   | ZSCAN25    | ARHGAP33   |
| LRIT3       | TTLL11     | VSIG10L    |
| FAM218A     | LCN1       | ZNF446     |
| AC107214.1  | VSTM4      | PPP1R3D    |

|            |         |            |
|------------|---------|------------|
| ANKRD33B   | IFIT2   | VPREB3     |
| AC099522.2 | ENTPD1  | SLC35E4    |
| ARRDC3.AS1 | INA     | AL357568.1 |
| AC010226.1 | MICAL2  | KBTBD8     |
| ZFP62      | TPCN2   | TMEM154    |
| ZNF391     | ABCC9   | FAM124A    |
| AL662884.3 | BCAT1   | FAM81A     |
| BMP5       | ACVRL1  | NOMO3      |
| OOEP       | PXN.AS1 | AC093462.1 |
| KIAA0408   | STARD13 | LENG8.AS1  |
| AL121933.2 | SMAD9   | TOX2       |

---

**Inter\_Duct**

---

| <b>P1</b>  | <b>P2</b> | <b>P3</b> | <b>P4</b> | <b>P5</b>  |
|------------|-----------|-----------|-----------|------------|
| TUBA1B     | VCAN      | GPRC5A    | ZFP36     | HBA1       |
| RRM2       | EFHD1     | PLAUR     | FOSB      | AC006387.1 |
| PCLAF      | NFIB      | EGR3      | JUNB      | CIRBP.AS1  |
| CDK1       | FRMD4A    | LMNA      | PPP1R15A  | TMEM81     |
| H2AFZ      | VGLL4     | ZNF750    | BTG2      | AC244453.2 |
| FEN1       | MGP       | YWHAZ     | ATF3      | GDF15      |
| MCM10      | HNRNPA1   | TM4SF1    | FOS       | ACTL10     |
| TUBB       | SERPINE2  | KRT17     | EGR3      | CD274      |
| TYMS       | BCL2      | EZR       | ZFP36L1   | AC027020.2 |
| NPB        | ITGA6     | CLDN4     | NFKBIA    | AC010359.2 |
| MYBL2      | FABP7     | KLF6      | MAFF      | CYB561D2.1 |
| C1orf54    | SRPK2     | KDM6B     | NR4A1     | SPACA6P.AS |
| ARHGAP24   | PBX1      | DSP       | TNFAIP3   | LINC00310  |
| DUT        | RASA1     | KLF5      | LMNA      | SNX20      |
| TK1        | MFGE8     | KRT8      | KLF6      | LINC02328  |
| MAD2L1     | CDK6      | ITPKC     | BHLHE40   | ZNF540     |
| ATAD2      | NRCAM     | SHC4      | FTH1      | CNTNAP3C   |
| KNTC1      | LRIG1     | CLIP1     | NR4A2     | WNT1       |
| DIAPH3     | MYB       | EMP1      | NFKBIZ    | ZNF578     |
| AC027682.6 | ADGRG6    | NR4A1     | JUN       | AL359878.1 |
| HMG2       | LDLRAD4   | SAT1      | CLDN4     | AL049779.4 |
| RACGAP1    | NREP      | NR4A3     | EFNA1     | AC107029.2 |
| CENPK      | AZGP1     | VMP1      | CLDN3     | AC131212.1 |
| HMGB1      | ART3      | SERPINB5  | KRT17     | AL109955.1 |
| TPX2       | SMARCC1   | IRF2BP2   | SAT1      | AC074044.1 |
| PCNA       | PRLR      | EEF1A1    | NCOA7     | AC120024.1 |
| PSMC3IP    | CD44      | RAB3IP    | EZR       | AL096701.4 |
| HIST1H4C   | MFAP3L    | PMAIP1    | PTX3      | FOS        |
| MCM7       | CSRP2     | INHBA     | CRYAB     | TNFRSF18   |
| HMGB2      | SEMA6D    | EDN1      | TIPARP    | JUNB       |
| MKI67      | AQP1      | WWTR1     | TMSB10    | JUN        |

|        |            |           |          |            |
|--------|------------|-----------|----------|------------|
| STAT4  | COL27A1    | RAP2B     | MSLN     | ZFP36      |
| NUSAP1 | NAP1L4     | FOSL1     | IER3     | IER2       |
| HELLS  | FAT1       | KRT16     | NAMPT    | EGR1       |
| CKS1B  | VIT        | PDE4B     | ANXA3    | IER3       |
| RGS5   | HNRNPA3    | MAP3K8    | ELF3     | BTG2       |
| CLSPN  | FLRT2      | SPAG9     | KLF10    | DDIT4      |
| STMN1  | SLC35F3    | TGIF1     | TPT1.AS1 | FOSB       |
| DEK    | SCRG1      | VCL       | TPM1     | AC132938.6 |
| RANBP1 | ZKSCAN1    | TPM4      | ETS2     | DUSP1      |
| HJURP  | VIM        | GADD45A   | CCNL1    | HES1       |
| CDCA8  | LDHB       | ZFAND5    | KLF4     | GADD45B    |
| FN1    | SPARC      | JUND      | RASGEF1B | RASD1      |
| ESCO2  | TM4SF18    | RAB11FIP1 | MIA      | SLC30A4    |
| TMPO   | SPPL3      | KLF3      | PMEPA1   | NFKBIA     |
| TACC3  | ABCA13     | CLDN3     | KRT8     | ADPRH      |
| MCM3   | AC092683.1 | ACTG1     | CSRNP1   | AP000442.1 |
| FOXM1  | MICAL3     | ZFP36L1   | MAP3K8   | ZFP36L1    |
| BTN3A3 | CRABP1     | IL27RA    | KRT6B    | PPP1R15A   |
| KIF23  | CAPS       | NCOA7     | TNF      | NR4A1      |

---

**MEC**

---

| <b>P1</b> | <b>P2</b>    | <b>P3</b> |
|-----------|--------------|-----------|
| ARID5B    | CYP2S1       | TPM2      |
| KLF6      | AC000065.2   | MYL9      |
| THBS1     | PRAG1        | ACTA2     |
| RCAN1     | LPL          | MYL6      |
| GADD45A   | AC068189.2   | TAGLN     |
| CALD1     | APBA1        | TPM1      |
| LDLR      | CCDC180      | SAA1      |
| TACSTD2   | BARX2        | NME2      |
| TPM4      | CLEC14A      | C5orf46   |
| SERPINB5  | ITGB3        | MYH11     |
| TRIB1     | TNFRSF14.AS1 | MGST3     |
| ERRFI1    | NCDN         | LGALS1    |
| TES       | ARTN         | PGK1      |
| RTN4      | LPAR3        | ENO1      |
| EDN1      | AKNAD1       | DALRD3    |
| TM4SF1    | NHLH2        | CTSZ      |
| NEDD4L    | ECM1         | MSRB3     |
| RAP2B     | SYT11        | NDUFA13   |
| EZR       | ZBED6        | TGFB1I1   |
| COL4A1    | ABCB10       | MGST1     |
| CSNK1A1   | DGUOK.AS1    | GAPDH     |
| COL4A2    | STK39        | ARPC3     |
| EGR3      | LINC00852    | SERF2     |

|            |            |          |
|------------|------------|----------|
| GLIPR1     | NUP210     | JOSD2    |
| SERPINE2   | ATP13A5    | PRDX5    |
| A2M        | AC110792.3 | FOLR1    |
| ADAMTS1    | EPB41L4A   | UQCR11   |
| KRT17      | STK32A     | MYL12B   |
| AL161431.1 | CAMK2A     | ETFB     |
| MYLK       | ETV7       | TSTD1    |
| ETS1       | RIMS1      | ANXA3    |
| AC016831.1 | HMG3.AS1   | BLVRB    |
| AMOTL2     | AL365259.1 | PIGT     |
| COL9A3     | AL356417.2 | MRPL36   |
| IRS2       | PDE1C      | CD151    |
| COL9A2     | DPY19L1    | TNFRSF14 |
| DDX5       | ZPBP       | LAPTM5   |
| DUSP6      | CFAP69     | SNRNP40  |
| MIR222HG   | RASA4      | GUK1     |
| CNN3       | MGAM       | FIBP     |
| COL9A1     | AC044893.1 | KRT7     |
| PLCB4      | OPLAH      | AAMDC    |
| NCOA7      | IGFBPL1    | MYLK     |
| ACTG2      | SVEP1      | ABCC5    |
| MYC        | VAV2       | EBP      |
| NR4A1      | IL15RA     | ATP5MC3  |
| NTRK3      | AGAP9      | PKM      |
| SRSF5      | STK33      | PPP1R14A |
| KLF5       | SYTL2      | PLEKHJ1  |
| PLAT       | ME3        | CNN1     |

---

**Supplementary Table 4. Genes belonging to module 5 and 13.**

| <b>Module 5 geneset</b> |        |             |           |           |  |
|-------------------------|--------|-------------|-----------|-----------|--|
| id                      | module | supermodule | dim_1     | dim_2     |  |
| GPR153                  | 5      | 1           | -5.007205 | 1.5422076 |  |
| RERE                    | 5      | 1           | -2.82665  | 2.2635716 |  |
| SPSB1                   | 5      | 1           | -3.21565  | 1.9036111 |  |
| LZIC                    | 5      | 1           | -3.756542 | 2.0042471 |  |
| TARDBP                  | 5      | 1           | -3.115615 | 2.0939163 |  |
| DDI2                    | 5      | 1           | -3.178537 | 2.0202283 |  |
| RCC2                    | 5      | 1           | -3.900816 | 1.7036618 |  |
| KDM1A                   | 5      | 1           | -4.272929 | 1.4908394 |  |
| RCAN3                   | 5      | 1           | -3.667017 | 1.6590899 |  |
| WASF2                   | 5      | 1           | -3.596046 | 1.9667777 |  |
| ZBTB8B                  | 5      | 1           | -4.956421 | 1.4666773 |  |
| RBBP4                   | 5      | 1           | -3.604729 | 1.9415025 |  |
| PHC2                    | 5      | 1           | -4.553259 | 1.0468336 |  |
| AGO1                    | 5      | 1           | -3.138649 | 2.0039724 |  |
| PABPC4                  | 5      | 1           | -3.665015 | 1.8723391 |  |
| GPBP1L1                 | 5      | 1           | -3.369774 | 1.9799169 |  |
| TTC39A                  | 5      | 1           | -3.97107  | 1.568813  |  |
| PRPF38A                 | 5      | 1           | -3.543763 | 1.8783063 |  |
| KANK4                   | 5      | 1           | -4.146931 | 2.3718246 |  |
| S100A9                  | 5      | 1           | -5.181973 | 1.5193845 |  |
| S100A8                  | 5      | 1           | -5.231831 | 1.5189301 |  |
| MPZL1                   | 5      | 1           | -3.455937 | 2.2805208 |  |
| ERVMER61-1              | 5      | 1           | -4.737498 | 1.3349646 |  |
| SERTAD4                 | 5      | 1           | -2.712389 | 2.2864012 |  |
| TGFB2                   | 5      | 1           | -4.854412 | 1.5047871 |  |
| SLC35F3                 | 5      | 1           | -3.999684 | 2.266034  |  |
| EXOC6B                  | 5      | 1           | -3.978457 | 1.9512261 |  |
| FAM178B                 | 5      | 1           | -4.320481 | 1.5325292 |  |
| MGAT4A                  | 5      | 1           | -4.827541 | 1.3504173 |  |
| LINC02611               | 5      | 1           | -5.015086 | 1.5026635 |  |
| EN1                     | 5      | 1           | -4.454297 | 0.967575  |  |
| FMNL2                   | 5      | 1           | -3.992871 | 1.6253981 |  |
| ITGA6                   | 5      | 1           | -4.166293 | 2.0894817 |  |
| RAPGEF4                 | 5      | 1           | -4.681777 | 1.3053757 |  |
| TTL4                    | 5      | 1           | -4.420017 | 1.4512307 |  |
| EFHD1                   | 5      | 1           | -4.604629 | 1.22722   |  |
| ATG7                    | 5      | 1           | -4.744643 | 1.172649  |  |
| NR1D2                   | 5      | 1           | -2.876824 | 2.1554068 |  |
| TOP2B                   | 5      | 1           | -3.407952 | 1.8408083 |  |
| ACVR2B                  | 5      | 1           | -4.390508 | 1.4872242 |  |
| ZNF621                  | 5      | 1           | -2.465129 | 2.2064542 |  |

|            |   |   |           |           |
|------------|---|---|-----------|-----------|
| AC099541.2 | 5 | 1 | -4.978692 | 1.4868962 |
| CTNNB1     | 5 | 1 | -3.285813 | 2.231306  |
| NME6       | 5 | 1 | -4.019914 | 1.05378   |
| CHDH       | 5 | 1 | -4.252699 | 1.6139318 |
| CCDC66     | 5 | 1 | -3.41081  | 1.6009959 |
| ARHGEF3    | 5 | 1 | -4.445832 | 1.427595  |
| IL17RD     | 5 | 1 | -4.58462  | 1.4488334 |
| PDE12      | 5 | 1 | -4.397863 | 1.2384266 |
| LRIG1      | 5 | 1 | -4.563129 | 1.5441119 |
| GSK3B      | 5 | 1 | -2.934169 | 2.1188668 |
| H1FX       | 5 | 1 | -4.606097 | 0.9563474 |
| RYK        | 5 | 1 | -3.169559 | 1.8954567 |
| TFDP2      | 5 | 1 | -3.137192 | 1.7594217 |
| GK5        | 5 | 1 | -4.20401  | 1.3906833 |
| TM4SF18    | 5 | 1 | -4.756154 | 1.1935412 |
| PLCH1      | 5 | 1 | -3.486033 | 1.6157309 |
| TBL1XR1    | 5 | 1 | -3.33702  | 2.0481557 |
| PIK3CA     | 5 | 1 | -2.759402 | 2.2055239 |
| DLG1       | 5 | 1 | -3.206873 | 1.9921879 |
| SPON2      | 5 | 1 | -4.5845   | 0.9754969 |
| MAEA       | 5 | 1 | -3.983234 | 2.2789735 |
| APBB2      | 5 | 1 | -4.266006 | 1.5019847 |
| KIT        | 5 | 1 | -4.020064 | 1.2749242 |
| REST       | 5 | 1 | -2.760432 | 2.0644535 |
| RUFY3      | 5 | 1 | -2.556882 | 2.2678713 |
| CCNG2      | 5 | 1 | -2.595337 | 2.351993  |
| BMPR1B     | 5 | 1 | -4.649308 | 1.4646355 |
| PDGFC      | 5 | 1 | -4.045438 | 2.3421191 |
| MFAP3L     | 5 | 1 | -4.284775 | 1.6136965 |
| SAP30      | 5 | 1 | -4.630625 | 0.9469487 |
| PDZD2      | 5 | 1 | -5.018226 | 1.5481831 |
| PRLR       | 5 | 1 | -3.448149 | 1.6004168 |
| RASA1      | 5 | 1 | -4.066605 | 2.3117761 |
| LINC00461  | 5 | 1 | -4.662994 | 1.1975507 |
| STARD4-AS1 | 5 | 1 | -4.146231 | 2.3387889 |
| NREP       | 5 | 1 | -4.110378 | 2.3546819 |
| DCP2       | 5 | 1 | -3.191216 | 1.9190339 |
| PITX1      | 5 | 1 | -4.646805 | 0.9024011 |
| KDM3B      | 5 | 1 | -3.665735 | 1.8239612 |
| CNOT6      | 5 | 1 | -3.097434 | 1.8392352 |
| PRPF4B     | 5 | 1 | -3.072692 | 2.0606841 |
| CDYL       | 5 | 1 | -4.168427 | 1.1472954 |
| ID4        | 5 | 1 | -4.61147  | 1.1837684 |
| C6orf62    | 5 | 1 | -2.849271 | 2.1920384 |

|                |   |   |           |           |
|----------------|---|---|-----------|-----------|
| HIST1H2BH      | 5 | 1 | -4.56027  | 0.9446687 |
| ATF6B          | 5 | 1 | -4.35436  | 1.4806391 |
| CLPSL1         | 5 | 1 | -4.913615 | 1.303183  |
| STK38          | 5 | 1 | -3.543613 | 1.5638484 |
| C6orf89        | 5 | 1 | -2.896017 | 2.1379861 |
| FAM83B         | 5 | 1 | -2.648303 | 2.3880843 |
| PHIP           | 5 | 1 | -3.394288 | 1.8266577 |
| PM20D2         | 5 | 1 | -4.483912 | 1.0150226 |
| AK9            | 5 | 1 | -4.292574 | 1.4229971 |
| HINT3          | 5 | 1 | -4.395828 | 0.9697648 |
| PTPRK          | 5 | 1 | -3.976921 | 1.3432177 |
| EPB41L2        | 5 | 1 | -4.485825 | 1.8004884 |
| CCN2           | 5 | 1 | -4.116644 | 2.3757304 |
| <b>MYB</b>     | 5 | 1 | -4.7192   | 1.3989991 |
| ADGRG6         | 5 | 1 | -4.796855 | 1.4459082 |
| SASH1          | 5 | 1 | -4.322892 | 1.3569332 |
| TAB2           | 5 | 1 | -2.929214 | 2.1807588 |
| FNDC1          | 5 | 1 | -4.150895 | 2.3879603 |
| QKI            | 5 | 1 | -2.830342 | 2.3011249 |
| AFDN           | 5 | 1 | -3.979236 | 1.2973124 |
| PHF10          | 5 | 1 | -3.862192 | 1.7141758 |
| CYTH3          | 5 | 1 | -4.332113 | 1.5111817 |
| AHR            | 5 | 1 | -4.201499 | 1.1456226 |
| CDCA7L         | 5 | 1 | -4.448309 | 0.8447551 |
| SNHG26         | 5 | 1 | -4.363199 | 0.8925945 |
| MTURN          | 5 | 1 | -3.24055  | 1.8991994 |
| AQP1           | 5 | 1 | -4.096154 | 1.8568362 |
| ZNF727         | 5 | 1 | -4.279354 | 1.2735931 |
| ZNF736         | 5 | 1 | -3.506125 | 1.7317416 |
| ZNF138         | 5 | 1 | -4.057035 | 1.2413768 |
| ZNF117         | 5 | 1 | -3.137873 | 2.0043768 |
| GTF2I          | 5 | 1 | -2.86094  | 2.1402797 |
| FZD1           | 5 | 1 | -3.208602 | 2.0313739 |
| GATAD1         | 5 | 1 | -3.066974 | 1.9799966 |
| ZNF3           | 5 | 1 | -4.034411 | 1.2364358 |
| PILRB          | 5 | 1 | -3.128263 | 1.8619508 |
| BCAP29         | 5 | 1 | -3.481762 | 2.0226425 |
| LAMB1          | 5 | 1 | -4.143023 | 2.393185  |
| MEST           | 5 | 1 | -4.669441 | 1.1628171 |
| AUXG01000058.1 | 5 | 1 | -4.431668 | 1.6975595 |
| UBN2           | 5 | 1 | -2.930023 | 2.1769503 |
| DENND11        | 5 | 1 | -4.236858 | 1.2228202 |
| RBM33          | 5 | 1 | -2.469388 | 2.3107528 |
| WDR60          | 5 | 1 | -2.703686 | 2.2859363 |



|             |   |   |           |           |
|-------------|---|---|-----------|-----------|
| PIWIL2      | 5 | 1 | -4.569514 | 1.0293099 |
| PPP3CC      | 5 | 1 | -4.703323 | 1.1827651 |
| NCALD       | 5 | 1 | -4.96128  | 1.4727126 |
| SMARCA2     | 5 | 1 | -2.550201 | 2.3242515 |
| KIAA2026    | 5 | 1 | -2.823282 | 2.1673039 |
| UHRF2       | 5 | 1 | -4.213363 | 1.4152583 |
| ELAVL2      | 5 | 1 | -4.734396 | 1.4840568 |
| DCAF10      | 5 | 1 | -2.800458 | 2.148868  |
| VPS13A      | 5 | 1 | -4.201097 | 1.8364033 |
| GNAQ        | 5 | 1 | -2.982661 | 2.1381425 |
| LINC01505   | 5 | 1 | -4.140588 | 2.4007906 |
| PALM2-AKAP2 | 5 | 1 | -4.443748 | 1.9079975 |
| ZNF618      | 5 | 1 | -4.123237 | 2.3695558 |
| RC3H2       | 5 | 1 | -3.306551 | 1.7705501 |
| NCS1        | 5 | 1 | -4.103138 | 2.2715863 |
| PRRC2B      | 5 | 1 | -2.941751 | 2.2082404 |
| TSC1        | 5 | 1 | -2.949838 | 2.0942873 |
| REXO4       | 5 | 1 | -4.161279 | 1.0491549 |
| BRD3        | 5 | 1 | -3.426421 | 1.5497002 |
| ENTR1       | 5 | 1 | -4.389381 | 1.0838865 |
| ZMYND19     | 5 | 1 | -4.594834 | 1.0555295 |
| UPF2        | 5 | 1 | -2.8108   | 2.1517862 |
| BEND7       | 5 | 1 | -4.132354 | 1.2723242 |
| FRMD4A      | 5 | 1 | -3.966058 | 1.3593315 |
| PLXDC2      | 5 | 1 | -3.577702 | 2.0491222 |
| ARHGAP21    | 5 | 1 | -2.912816 | 2.2669343 |
| PARD3       | 5 | 1 | -3.631675 | 2.0758299 |
| TM9SF3      | 5 | 1 | -2.906711 | 2.1368112 |
| NAV2        | 5 | 1 | -3.985026 | 1.6917664 |
| CCDC34      | 5 | 1 | -4.491557 | 0.8060752 |
| LGR4        | 5 | 1 | -3.775674 | 2.1219834 |
| DTX4        | 5 | 1 | -4.118052 | 1.6355654 |
| SNHG1       | 5 | 1 | -4.292886 | 1.1187307 |
| LINC02747   | 5 | 1 | -4.787698 | 1.3374983 |
| FAM181B     | 5 | 1 | -4.979877 | 1.5113853 |
| ST3GAL4     | 5 | 1 | -4.004677 | 2.291686  |
| ATN1        | 5 | 1 | -2.99245  | 1.8407558 |
| ATF7IP      | 5 | 1 | -2.622935 | 2.1854142 |
| ST8SIA1     | 5 | 1 | -4.952324 | 1.4929115 |
| DIP2B       | 5 | 1 | -3.168807 | 1.9039921 |
| KRT6C       | 5 | 1 | -5.224986 | 1.5099327 |
| KRT6A       | 5 | 1 | -5.227731 | 1.4955114 |
| MDM1        | 5 | 1 | -4.474395 | 1.2001549 |
| NUP107      | 5 | 1 | -4.409424 | 1.0389301 |

|          |   |   |           |           |
|----------|---|---|-----------|-----------|
| SLC35E3  | 5 | 1 | -4.502388 | 1.3247763 |
| MDM2     | 5 | 1 | -4.220016 | 1.3537005 |
| CPM      | 5 | 1 | -4.818882 | 1.3825678 |
| CPSF6    | 5 | 1 | -4.336782 | 1.4564454 |
| YEATS4   | 5 | 1 | -4.425244 | 0.7840473 |
| FRS2     | 5 | 1 | -4.309532 | 1.2044972 |
| CNOT2    | 5 | 1 | -4.165814 | 1.2437931 |
| ZFC3H1   | 5 | 1 | -3.416994 | 1.8494228 |
| RAB21    | 5 | 1 | -4.100205 | 1.1465179 |
| TBC1D15  | 5 | 1 | -4.058944 | 1.1687082 |
| ATXN7L3B | 5 | 1 | -4.060133 | 1.1813294 |
| PAWR     | 5 | 1 | -4.082912 | 1.3839125 |
| PPP1R12A | 5 | 1 | -3.615417 | 2.1495613 |
| LRRIQ1   | 5 | 1 | -4.604085 | 1.3296851 |
| SLC5A8   | 5 | 1 | -4.965389 | 1.4970039 |
| RFLNA    | 5 | 1 | -4.710429 | 1.2834653 |
| FBRSL1   | 5 | 1 | -4.297555 | 1.1189207 |
| RBM26    | 5 | 1 | -2.67187  | 2.291057  |
| RAD51B   | 5 | 1 | -4.559341 | 1.1014794 |
| CIPC     | 5 | 1 | -4.233326 | 1.407267  |
| FOXN3    | 5 | 1 | -2.626844 | 2.3421921 |
| MTA1     | 5 | 1 | -3.927812 | 1.2175194 |
| FAM98B   | 5 | 1 | -3.617331 | 1.5946568 |
| BMF      | 5 | 1 | -4.682224 | 1.4922387 |
| OIP5-AS1 | 5 | 1 | -4.148583 | 1.0595015 |

---

**Module 13 geneset**

---

| id       | module | supermodule | dim_1     | dim_2     |
|----------|--------|-------------|-----------|-----------|
| KLHL21   | 13     | 1           | 3.720566  | -0.291338 |
| IFFO2    | 13     | 1           | 2.9059997 | -0.284772 |
| STX12    | 13     | 1           | 3.8137643 | 0.1324395 |
| ZC3H12A  | 13     | 1           | 3.3741875 | -0.429461 |
| TACSTD2  | 13     | 1           | 3.9132469 | -0.225617 |
| GADD45A  | 13     | 1           | 3.8486478 | -0.086036 |
| GTF2B    | 13     | 1           | 3.7892549 | -0.094294 |
| RHOC     | 13     | 1           | 5.0010023 | 0.3855158 |
| S100A10  | 13     | 1           | 4.5897138 | 0.1623436 |
| S100A11  | 13     | 1           | 4.5433073 | 0.1141657 |
| IL6R     | 13     | 1           | 3.8834577 | 0.1021332 |
| LMNA     | 13     | 1           | 4.097357  | 0.2780219 |
| IFI16    | 13     | 1           | 3.8922217 | -0.426862 |
| LAMC2    | 13     | 1           | 3.8699086 | 0.0684818 |
| PRELP    | 13     | 1           | 4.529804  | -0.273521 |
| B3GALNT2 | 13     | 1           | 3.8822811 | 0.1255213 |
| PXDN     | 13     | 1           | 3.8478033 | -0.171736 |

|            |    |   |           |           |
|------------|----|---|-----------|-----------|
| ZFP36L2    | 13 | 1 | 3.2684581 | 0.0230812 |
| RTN4       | 13 | 1 | 3.7207031 | -0.136092 |
| CCDC88A    | 13 | 1 | 4.2833073 | -0.456485 |
| REL        | 13 | 1 | 3.2625966 | -0.26199  |
| PAX8-AS1   | 13 | 1 | 4.4043956 | -0.400622 |
| NFE2L2     | 13 | 1 | 3.7712405 | -0.504565 |
| COQ10B     | 13 | 1 | 3.5714109 | -0.148097 |
| NRP2       | 13 | 1 | 4.4067628 | -0.334202 |
| IGFBP2     | 13 | 1 | 4.4850628 | -0.360169 |
| CSRNP1     | 13 | 1 | 3.9406712 | 0.029765  |
| GNAI2      | 13 | 1 | 4.399502  | 0.0525321 |
| FRMD4B     | 13 | 1 | 4.2538686 | -0.51445  |
| ATP1B3     | 13 | 1 | 3.7747917 | -0.367092 |
| RAP2B      | 13 | 1 | 3.7098465 | -0.103674 |
| TIPARP     | 13 | 1 | 3.3140616 | -0.036759 |
| RNF212     | 13 | 1 | 4.7741084 | 0.2266089 |
| CXCL2      | 13 | 1 | 3.2391179 | -0.45979  |
| NFKB1      | 13 | 1 | 3.5657096 | -0.190008 |
| SGMS2      | 13 | 1 | 3.7167752 | -0.017353 |
| SLC25A4    | 13 | 1 | 4.6830943 | 0.1503612 |
| BASP1      | 13 | 1 | 4.2822854 | -0.490105 |
| IL6ST      | 13 | 1 | 3.8713958 | -0.538249 |
| ZSWIM6     | 13 | 1 | 3.6418149 | -0.220384 |
| HAPLN1     | 13 | 1 | 4.4681287 | -0.363765 |
| ELL2       | 13 | 1 | 3.6105592 | -0.1592   |
| PDLIM4     | 13 | 1 | 4.0606534 | -0.328315 |
| IRF1       | 13 | 1 | 3.2473912 | -0.529502 |
| SQSTM1     | 13 | 1 | 3.2424314 | -0.417051 |
| TUBB2A     | 13 | 1 | 3.9647028 | 0.064643  |
| IER3       | 13 | 1 | 3.2151942 | -0.379748 |
| HSPA1A     | 13 | 1 | 3.0018452 | -0.249642 |
| CDKN1A     | 13 | 1 | 3.9549029 | 0.0255028 |
| MDFI       | 13 | 1 | 4.9713964 | 0.4345573 |
| TNFAIP3    | 13 | 1 | 3.2565675 | -0.378565 |
| CREB5      | 13 | 1 | 3.8109405 | -0.098689 |
| IFRD1      | 13 | 1 | 3.2375796 | 0.0459958 |
| AC016831.1 | 13 | 1 | 3.8117087 | -0.178223 |
| LINC-PINT  | 13 | 1 | 4.0186164 | 0.0516347 |
| CLDN23     | 13 | 1 | 4.7943461 | 0.2790848 |
| TUSC3      | 13 | 1 | 4.4951351 | 0.1317462 |
| DPYSL2     | 13 | 1 | 4.7681055 | 0.2223274 |
| SARAF      | 13 | 1 | 4.3348429 | 0.0339893 |
| FGFR1      | 13 | 1 | 4.3688035 | -0.45051  |
| TACC1      | 13 | 1 | 4.2578108 | -0.396156 |

|              |    |   |           |           |
|--------------|----|---|-----------|-----------|
| SFRP1        | 13 | 1 | 4.3570828 | -0.470732 |
| CEBPD        | 13 | 1 | 4.0082362 | 0.1033267 |
| SDCBP        | 13 | 1 | 4.4363732 | -0.018793 |
| <b>MYBL1</b> | 13 | 1 | 4.4569249 | -0.36704  |
| MTDH         | 13 | 1 | 4.2206163 | 0.1081911 |
| ZNF706       | 13 | 1 | 4.6660819 | 0.527574  |
| KLF10        | 13 | 1 | 3.9601521 | 0.0192369 |
| ENY2         | 13 | 1 | 4.6580024 | 0.2152389 |
| TRIB1        | 13 | 1 | 3.4004333 | 0.0645021 |
| EFR3A        | 13 | 1 | 4.3025515 | -0.489963 |
| EEF1D        | 13 | 1 | 4.9525278 | 0.2824897 |
| PLEC         | 13 | 1 | 4.1878962 | -0.350688 |
| GPAA1        | 13 | 1 | 4.709902  | 0.0696095 |
| CYC1         | 13 | 1 | 4.6903825 | 0.1216418 |
| RPL8         | 13 | 1 | 5.0059008 | 0.3560914 |
| CCDC107      | 13 | 1 | 4.5044489 | 0.165172  |
| CEMIP2       | 13 | 1 | 3.9281764 | 0.0083779 |
| CARD19       | 13 | 1 | 4.6900494 | 0.3974995 |
| STOM         | 13 | 1 | 3.6979873 | -0.408961 |
| PFKFB3       | 13 | 1 | 3.1547251 | -1.020911 |
| VIM          | 13 | 1 | 4.7716844 | 0.1003162 |
| ARID5B       | 13 | 1 | 3.8383539 | -0.142462 |
| P4HA1        | 13 | 1 | 4.3515441 | -0.439533 |
| VCL          | 13 | 1 | 3.6021776 | -0.443788 |
| ANXA11       | 13 | 1 | 3.4663477 | -0.743101 |
| BAG3         | 13 | 1 | 3.5271497 | -0.527456 |
| CAVIN3       | 13 | 1 | 4.4859979 | 0.0254136 |
| RIC3         | 13 | 1 | 4.4284    | 0.0730292 |
| LDHA         | 13 | 1 | 4.5470278 | -0.042684 |
| C1QTNF4      | 13 | 1 | 4.7975111 | 0.1457826 |
| FTH1         | 13 | 1 | 4.970619  | 0.3089277 |
| SLC3A2       | 13 | 1 | 3.6883321 | -0.144568 |
| NEAT1        | 13 | 1 | 2.9580029 | -0.51404  |
| CCDC85B      | 13 | 1 | 5.1422577 | 0.6294853 |
| NECTIN1      | 13 | 1 | 3.6910269 | -0.310217 |
| TRIM29       | 13 | 1 | 3.9638178 | -0.291421 |
| CLMP         | 13 | 1 | 4.3141217 | -0.420382 |
| ETS1         | 13 | 1 | 3.7445648 | -0.317785 |
| CCND2        | 13 | 1 | 4.1733022 | -0.4893   |
| CD9          | 13 | 1 | 3.8367519 | -0.376476 |
| TUBA1C       | 13 | 1 | 3.7770376 | -0.34942  |
| KRT81        | 13 | 1 | 4.4602735 | 0.1340639 |
| GLIPR1       | 13 | 1 | 3.789026  | -0.143263 |
| ATP2B1       | 13 | 1 | 3.945061  | -0.474545 |

|          |    |   |           |           |
|----------|----|---|-----------|-----------|
| WDR66    | 13 | 1 | 4.7213695 | 0.2598559 |
| UBC      | 13 | 1 | 3.8944349 | -0.044425 |
| IRS2     | 13 | 1 | 3.7177784 | -0.057505 |
| FAM177A1 | 13 | 1 | 3.6919773 | -0.366743 |
| NFKBIA   | 13 | 1 | 3.2044527 | -0.289626 |
| FERMT2   | 13 | 1 | 3.8373141 | -0.346454 |
| ARG2     | 13 | 1 | 4.033334  | 0.0366522 |
| SRSF5    | 13 | 1 | 3.7417688 | -0.315991 |
| CALM1    | 13 | 1 | 4.1308024 | -0.012409 |
| SERPINA3 | 13 | 1 | 4.8815207 | 0.4880475 |
| ANXA2    | 13 | 1 | 3.5457418 | -0.967849 |

---
